# Supplementary material for: MicroRNA-125b-5p regulates IL-1β induced inflammatory genes via targeting TRAF6-mediated MAPKs and NF-κB signaling in human osteoarthritic chondrocytes
Source: PubMed Central journal article supplement (PMC6499837; doi:10.1038/s41598-019-42601-3), 2019-05-03

**MicroRNA-125-5p regulates IL-1 $\beta$  induced inflammatory genes via targeting TRAF6-mediated MAPKs and NF- $\kappa$ B signaling in human osteoarthritic chondrocytes**

Zafar Rasheed<sup>1,\*</sup>, Naila Rasheed<sup>1</sup>, Waleed Al Abdulmonem<sup>2</sup>, Muhammad Ismail Khan<sup>3</sup>,

<sup>1</sup>Department of Medical Biochemistry, College of Medicine, Buraidah, Qassim University, KSA; <sup>2</sup>Department of Pathology, College of Medicine, Buraidah, Qassim University, KSA; <sup>3</sup>Faculty of Medicine, School of Public Health, University of Queensland, Brisbane, Australia.

**\*Corresponding author:**

Dr. Zafar Rasheed, Department of Medical Biochemistry, College of Medicine, Qassim University, P.O. Box 6655, Buraidah-51452, KSA.

Email: [zafarrasheed@qumed.edu.sa](mailto:zafarrasheed@qumed.edu.sa)

### Selection of area of cartilage slicing from the discarded OA knee tissues

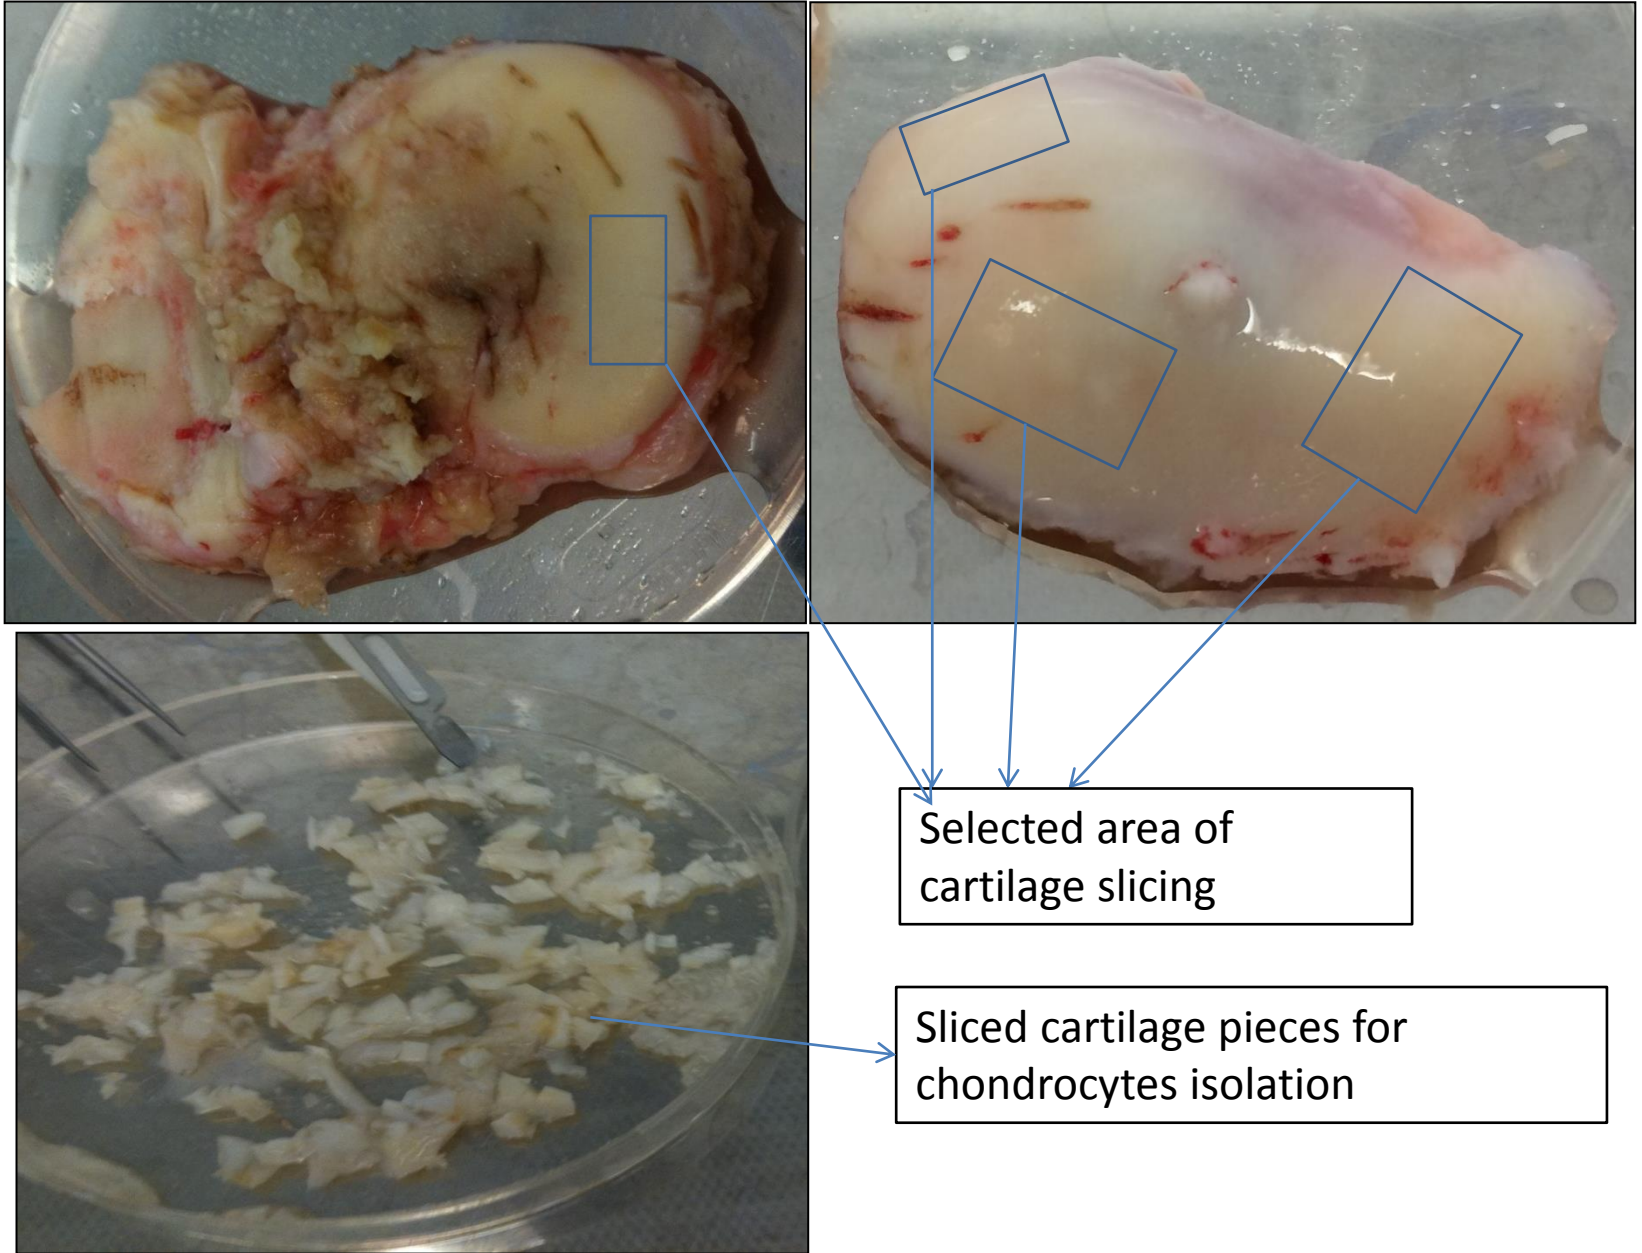

Figure 1 D: Lane 1 and Lane 2 were cropped

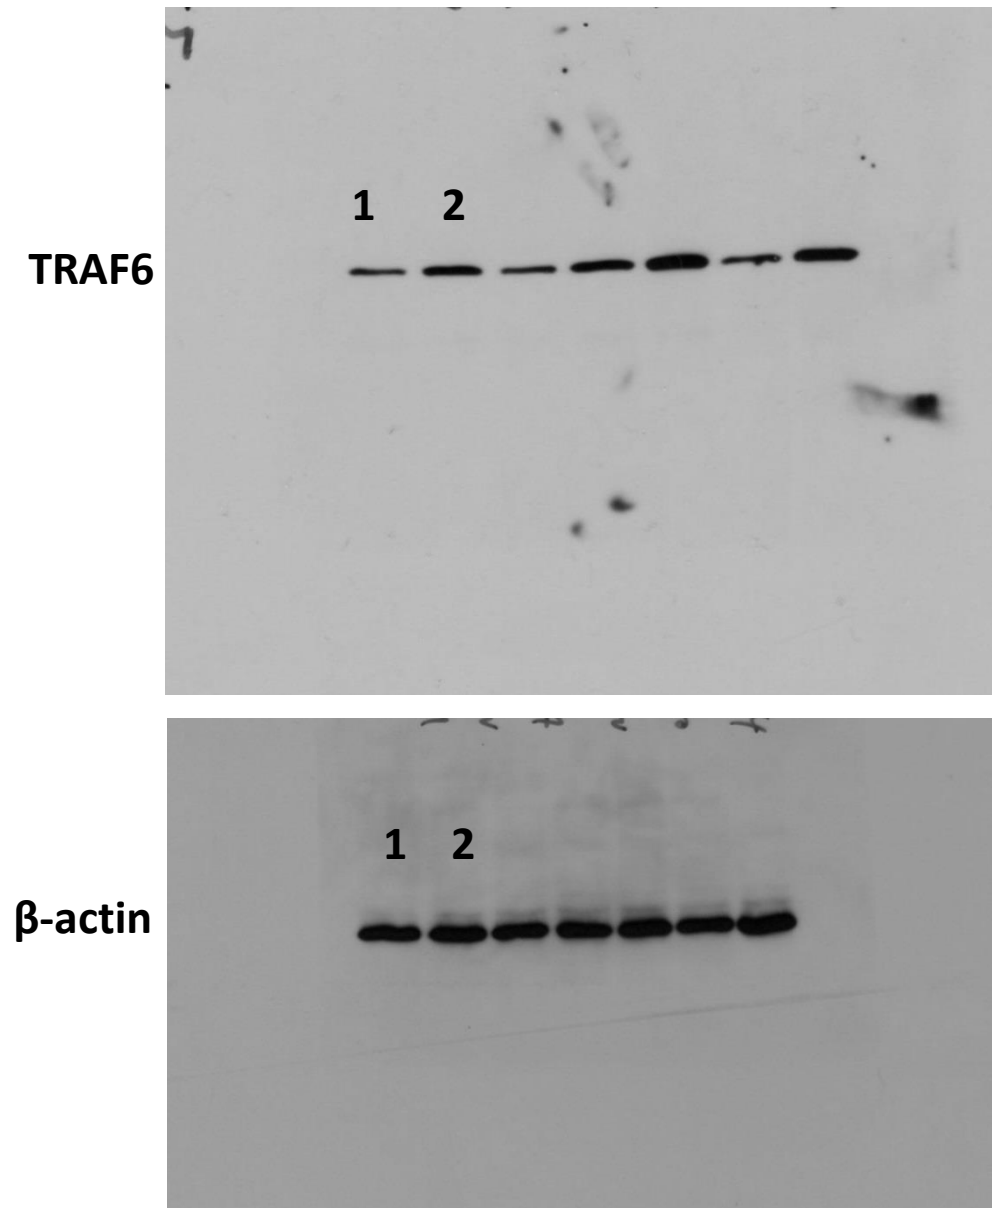

Figure 3 C: Lane 3 and 4 were cropped

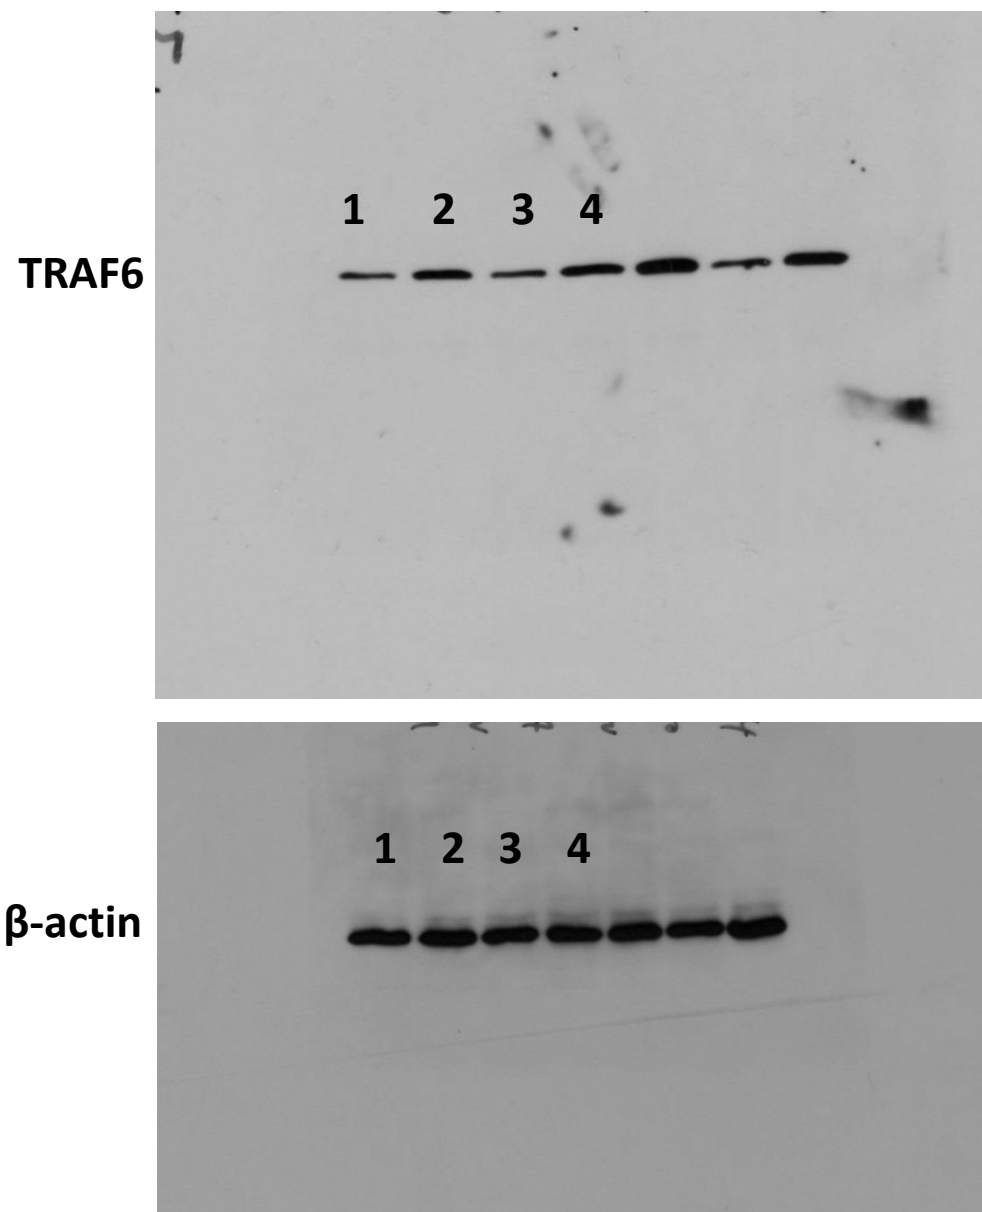

Figure 3 F: Lane 1, 2, 3, 4, 5 and 6 were cropped

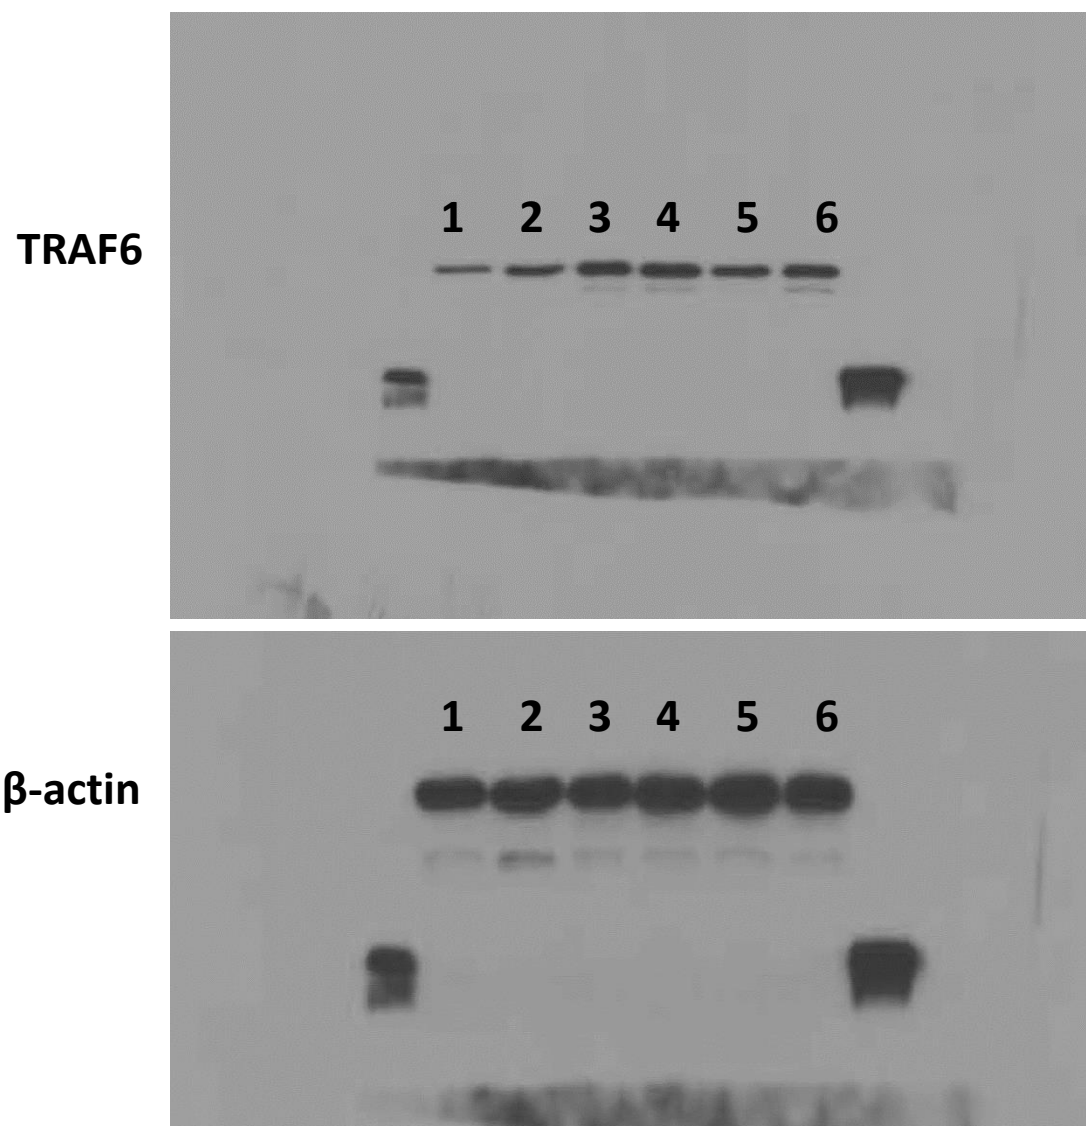

Figure 4 A: Lane 5, 6, 7, 8, 9, and 10 were cropped

P-p38-MAPK

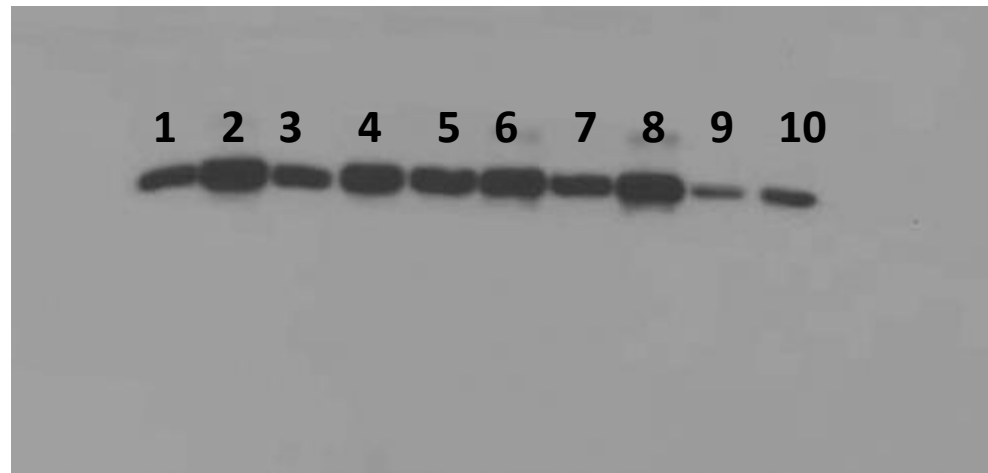

P-38-MAPK

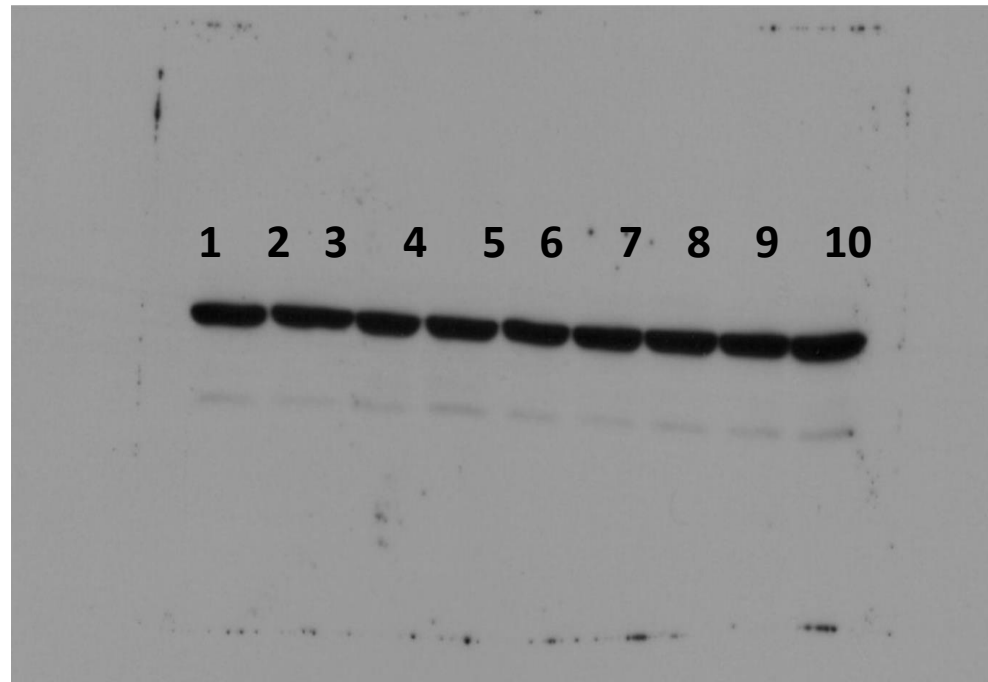

Figure 4 C: Lane 1, 2, 3, 4, 5, and 6 were cropped

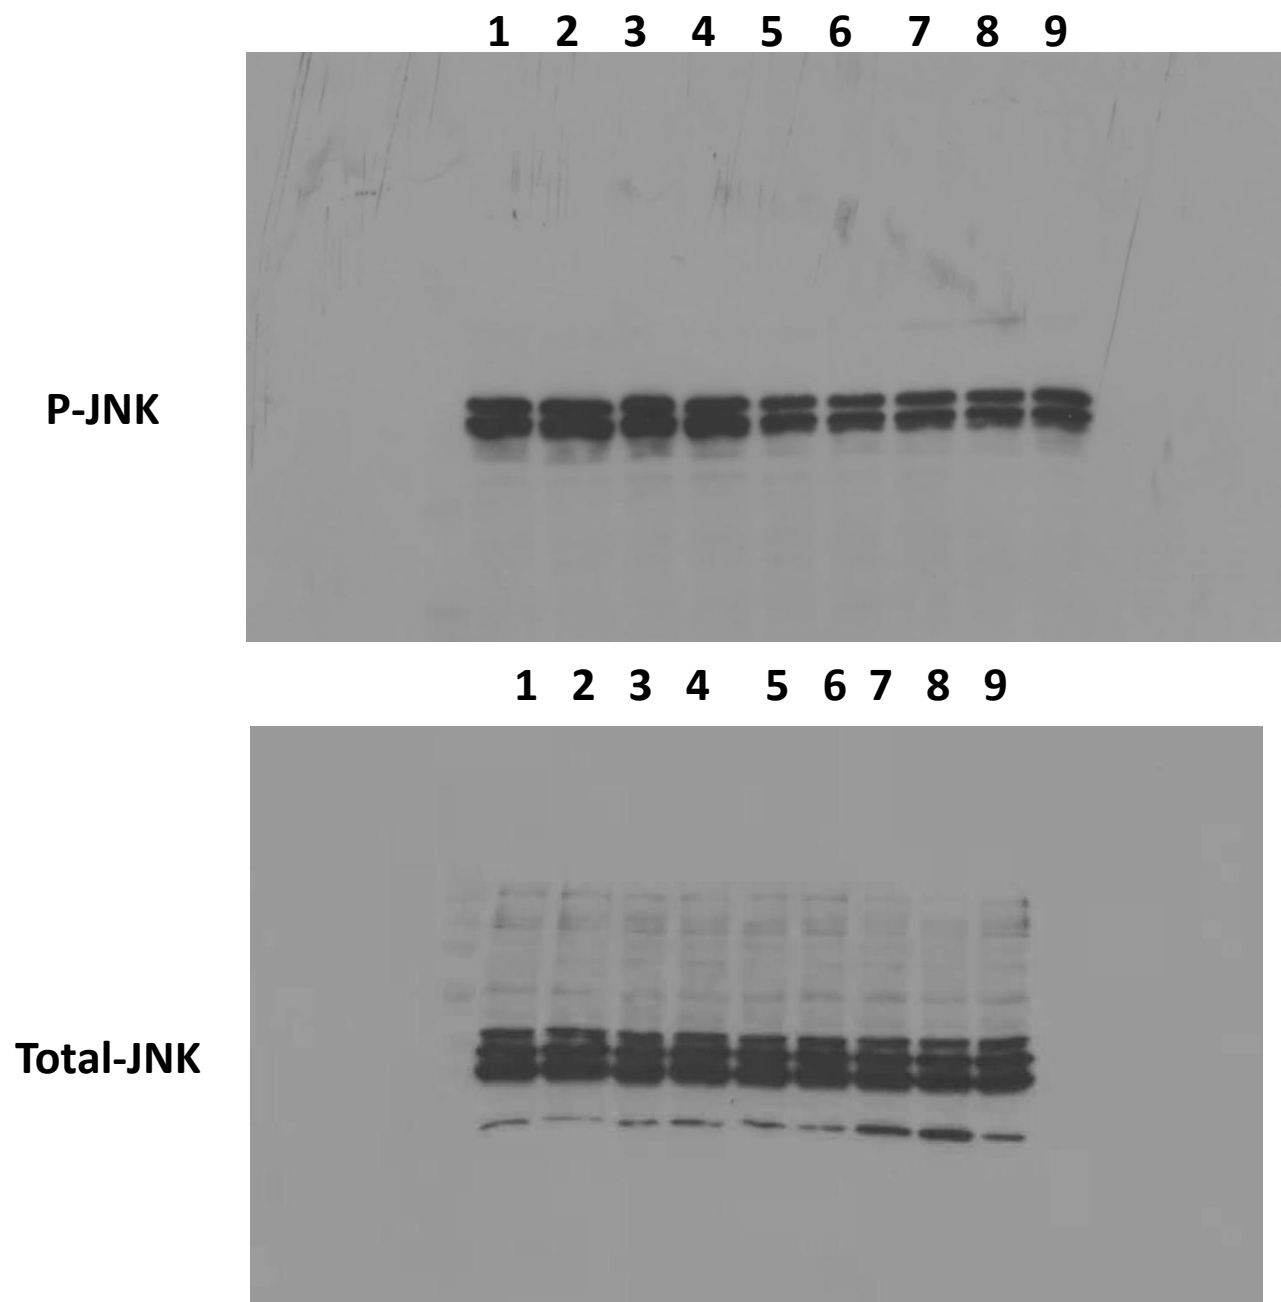

Figure 4 E: Lane 1, 2, 3, 4, 5 and 6 were cropped

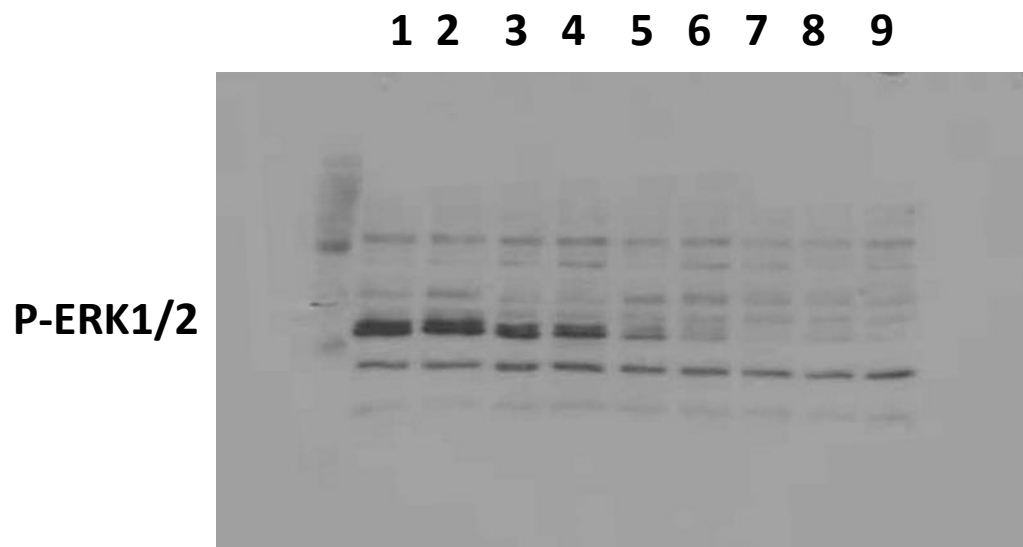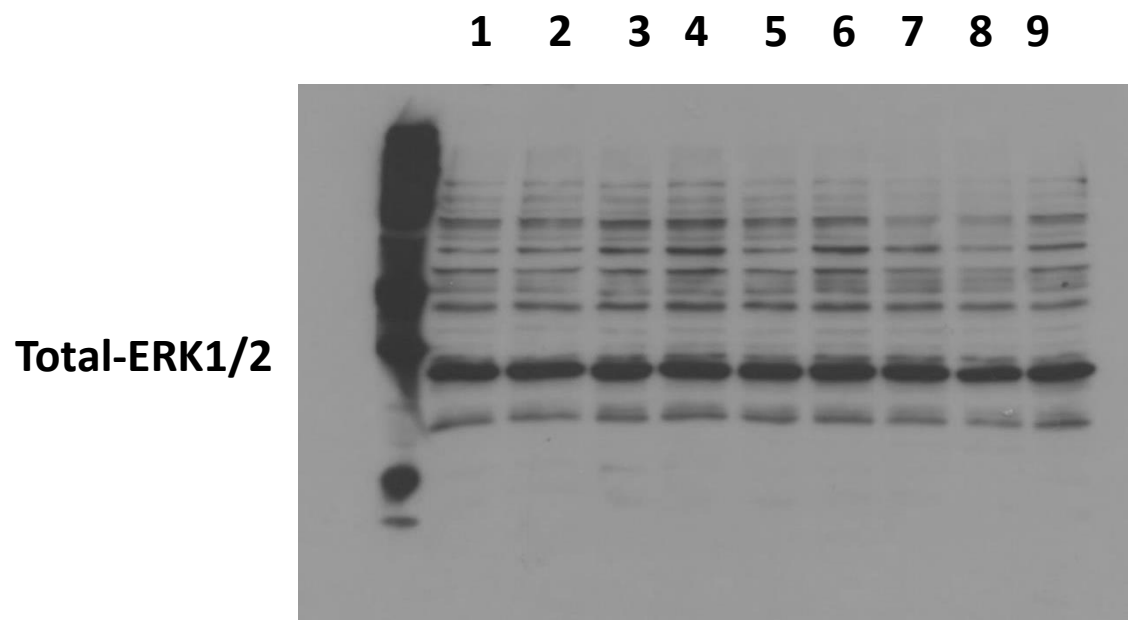



Figure 5 C: Lane 1, 2, 3, 4, 5, and 6 were cropped

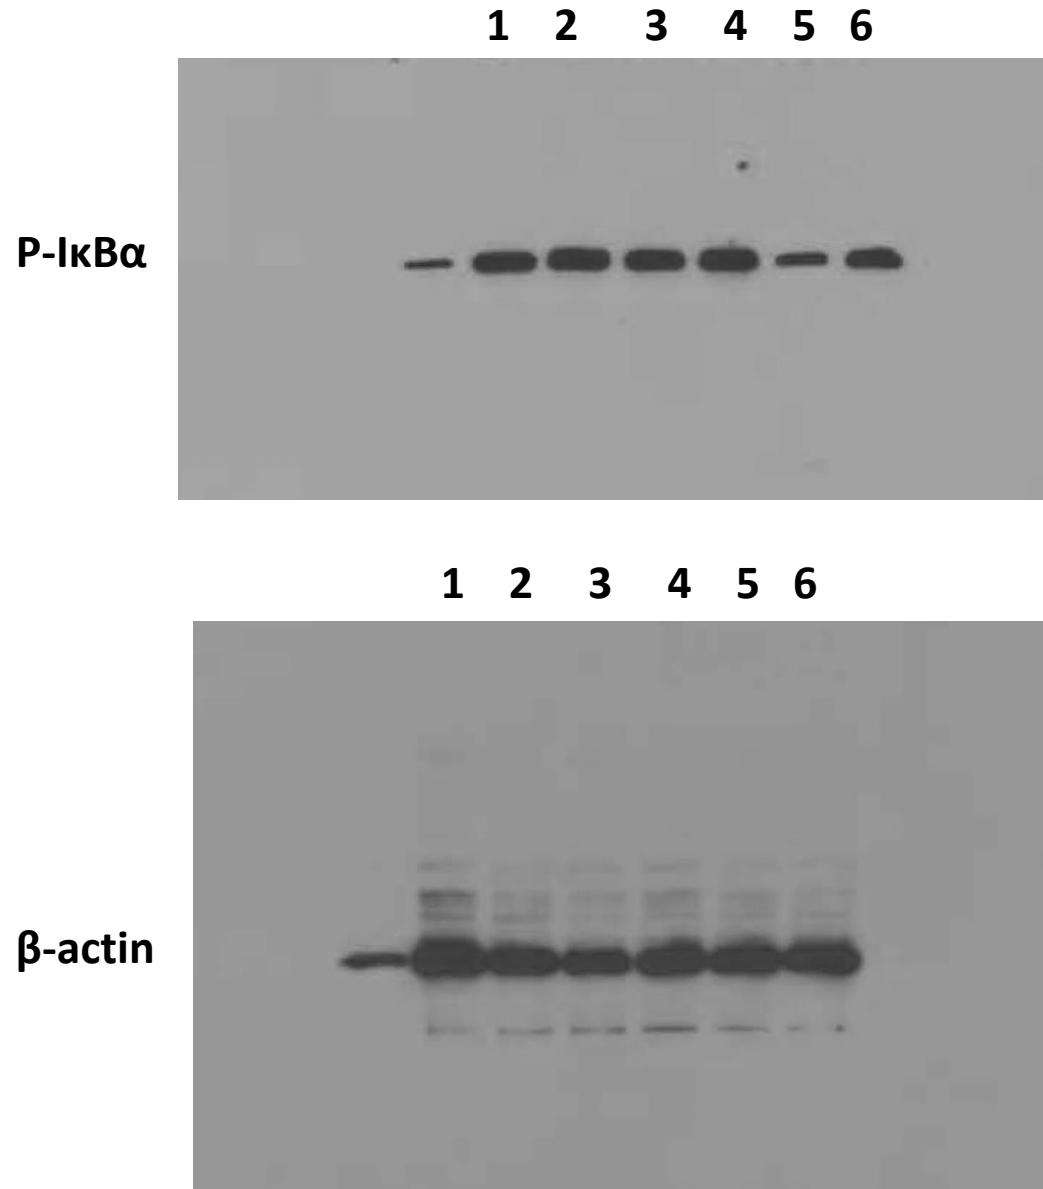

Figure 5 F: Lane 1, 2 and 3 were cropped

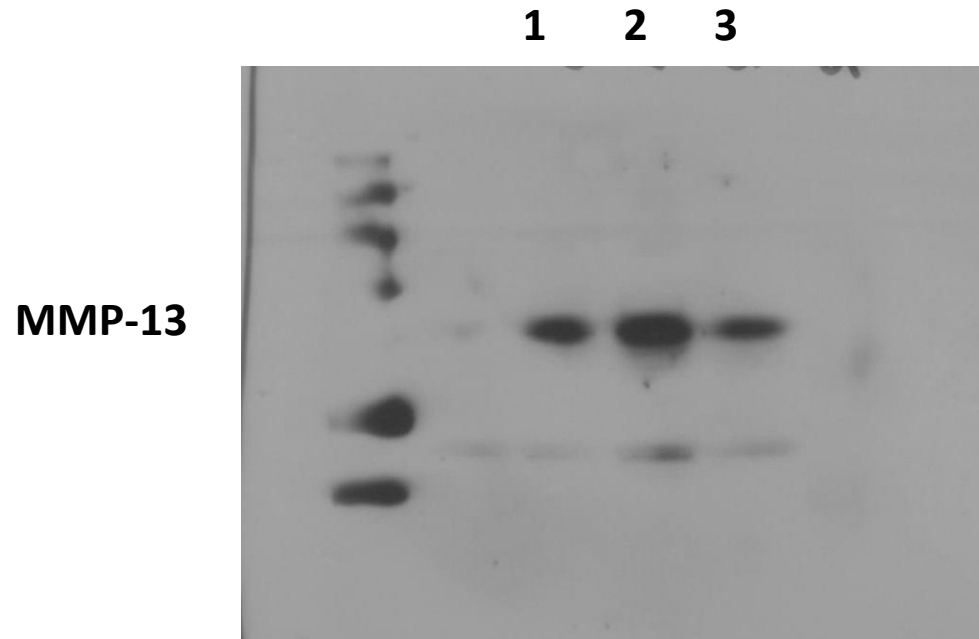

Figure 6 B: Lane 1, 2, 3, 4, 5, 6, 7 and 8 were cropped

1 2 3 4 5 6 7 8

MMP-13

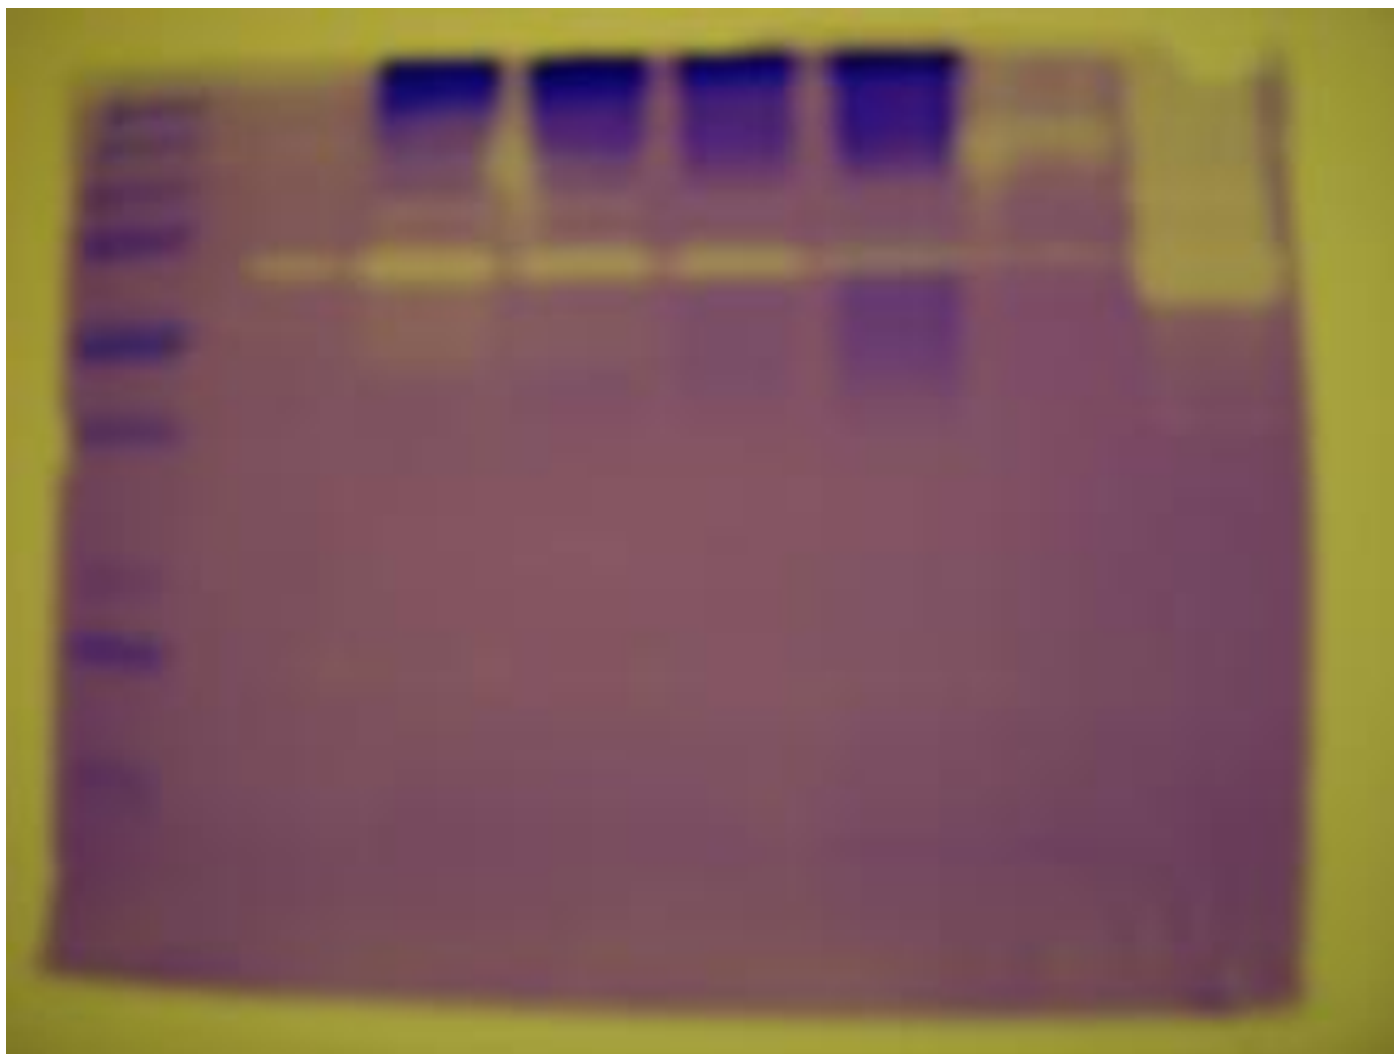

Supplement: 41598_2019_42601_MOESM1_ESM.pdf [file 41598_2019_42601_MOESM1_ESM.pdf]
